# Supplementary material
Source: MDPI journal article supplement (https://www.mdpi.com/1661-3821/3/2/17)
Supplement: s1 [file s1]

# Behavioral and Biochemical Evaluation of Anti-Depressive and Oxidative Stress-Ameliorating Effects of Amber Extract in Adult Male ICR Mice

Sandra Somuah-Asante <sup>1</sup>, Mahmoud Ben Othman <sup>2</sup>, Reiko Takeda <sup>2,3</sup>, Kazuma Okazaki <sup>3</sup>, Marie Sekita <sup>3</sup> and Kazuichi Sakamoto <sup>1,2,\*</sup>

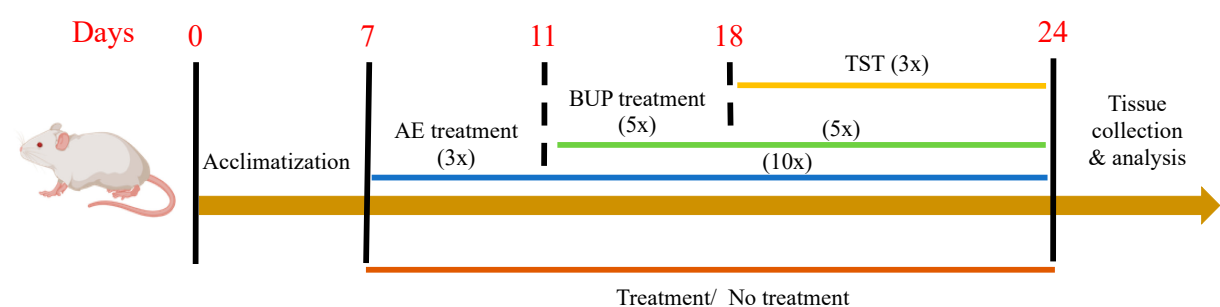

**Figure S1.** Experimental design.  
X means times.
